# Supplementary material for: High-resolution short-exposure small-animal laboratory x-ray phase-contrast tomography
Source: PubMed Central journal article supplement (PMC5153650; doi:10.1038/srep39074), 2016-12-13
Supplement: srep39074-s1.pdf [file srep39074-s1.pdf]

## Supplementary material

# High-resolution short-exposure small-animal laboratory x-ray phase-contrast tomography

Daniel H. Larsson,<sup>1</sup> William Vågberg,<sup>1</sup> Andre Yaroshenko,<sup>2</sup> Ali Önder Yildirim<sup>3</sup>, and Hans M. Hertz<sup>1</sup>

<sup>1</sup> Department of Applied Physics, KTH Royal Institute of Technology/Albanova, 106 91 Stockholm, Sweden

<sup>2</sup> Physik-Department & Institut für Medizintechnik, Technische Universität München, Garching, Germany.

<sup>3</sup> Institute of Lung Biology and Disease, Member of the German Center for Lung Research (DZL), Helmholtz Zentrum München, Neuherberg, Germany.

\*Correspondence: [hertz@biox.kth.se](mailto:hertz@biox.kth.se)

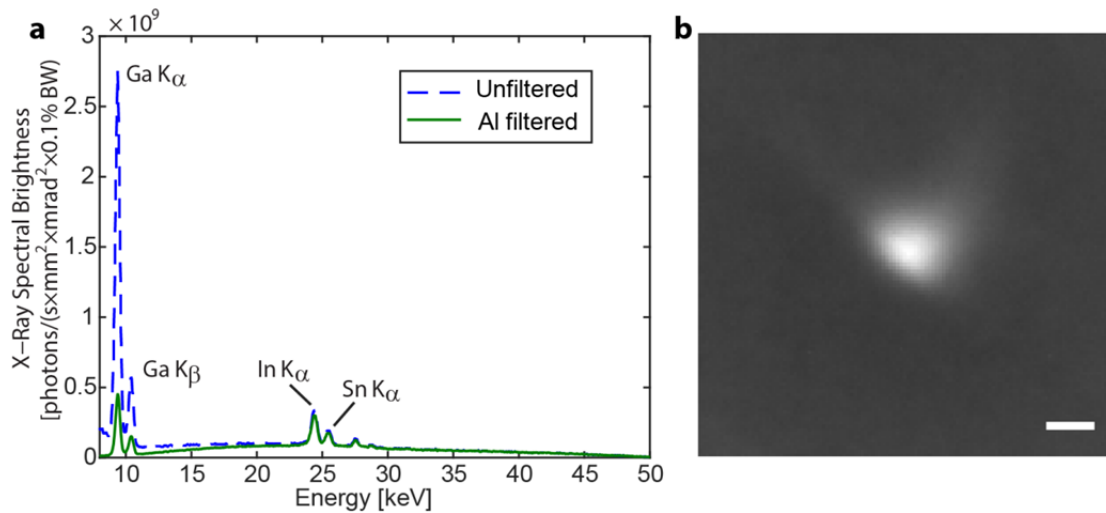

**Figure S1. X-ray source properties.** (a) Liquid-metal-jet source brightness with and without the 210  $\mu\text{m}$  Al filtering when operated at 400 W and 8  $\mu\text{m}$  spot size. It is clear that a thicker Al filter would reduce the dose-contributing 9 keV peaks even further but at the expense of longer exposure time since it also would reduce the 15–35 keV flux essential for the imaging. (b) Zone-plate image of the source spot showing the 8  $\mu\text{m}$  FWHM spot with short tails. Scale bar, 5  $\mu\text{m}$ .

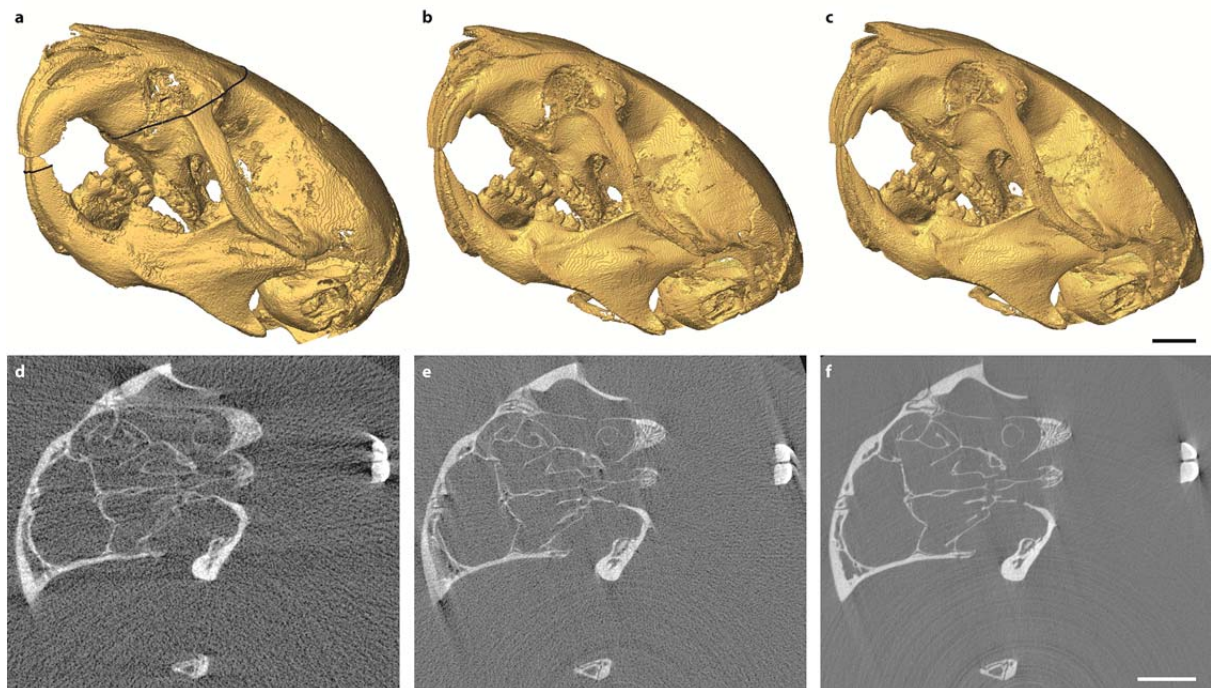

**Figure S2. Comparison of image quality in mouse skull absorption tomography.** Here we show surface rendering of the mouse skull and a selected tomographic slice from three experiments with different exposure times. (a) and (d) 73 second exposure time (120 projections  $\times$  0.6 s, 1.5°/projection, over 180°) and 400 mGy dose. (b) and (e) 6-minute exposure time (180 projections  $\times$  2 s, 1.0°/projection, over 180°) and 1.9 Gy. (c) and (f) 30-minute exposure time (900 projections  $\times$  2 s, 0.2°/projection, over 180°) and 9.4 Gy. Black scale bar for (a-c), 2 mm. White scale bar for (d-f), 2 mm. The black line in (a) indicates the position of the tomographic slices in (d-f).

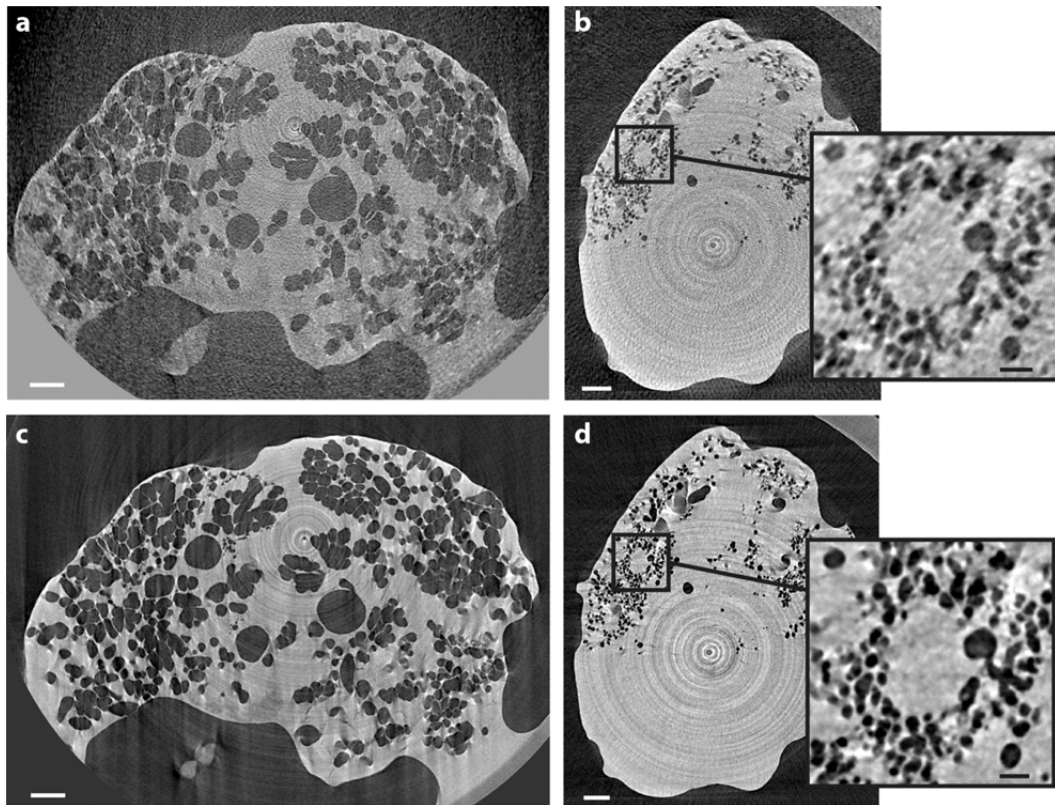

**Figure S3. Comparison of image quality in PBI lung imaging.** Upper row: 6 minute exposure time (180 projections x 2 s, 1.0°/projection, over 180°; 2.6 Gy) of sick (a) and healthy (b) lungs. Lower row: 30 minute exposure time (180 projections x 2 s, 0.2°/projection, over 180°; 13 Gy) of the same sick (c) and healthy (d) lungs. Here the longer exposures produce a clearer image. White scale bars, 1 mm. Black scale bars, 250  $\mu$ m.

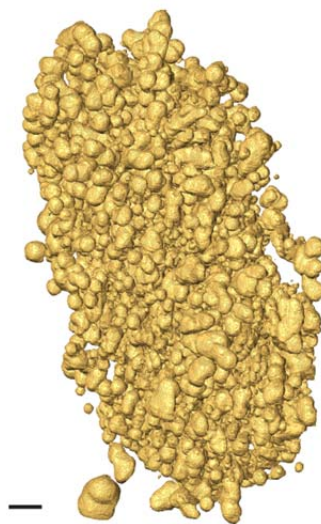

**Figure S4. Alveolar structure in excised air-filled lung with emphysema.** Surface rendering of lung alveolar structure from a 20 minute, 7.2 Gy exposure. Scale bar, 500  $\mu$ m. See also video.

|                      | Diam=684 $\mu\text{m}$ | Diam=176 $\mu\text{m}$ | Diam=50 $\mu\text{m}$ | Diam=23 $\mu\text{m}$ |
|----------------------|------------------------|------------------------|-----------------------|-----------------------|
| <b>Fig 2a: 120 s</b> | 127                    | 52                     | 26                    | 17                    |
| <b>Fig 2b: 60 s</b>  | 92                     | 36                     | 18                    | 10                    |
| <b>Fig 2c: 12 s</b>  | 39                     | 15                     | 6.7                   | 3.8                   |

**Table S1. Signal-to-noise ratio (SNR) in the Fig. 3a-3c phantom projection imaging.**

We use the differential signal-to-noise ratio as a quantitative measure on what objects can be detected in the projection images of our angiography/lung phantom. The SNR of each tube is calculated for a length of the tube equal to its width according to equation (7.6) in Ref. 35, which is analogous to equation (3.2) in Ref. S1,

$$\text{SNR}^2 = m \frac{(S - S_{bg})^2}{\sigma_{bg}^2},$$

where  $m$  is the extent of the object in number of pixels,  $S$  is the average pixel value of the object,  $S_{bg}$  the average background intensity, and  $\sigma_{bg}^2$  the standard deviation of the background. The detectability limit is typically set to  $\text{SNR} \approx 5$  (cf. the Rose criterion). We note that this limit is approximate by definition, and that the actual experimental limit is also influenced by, e.g., observer and noise properties.

#### Reference

S1. Jacob Beutel, Harold L Kundel, and Richard L Van Metter. *Handbook of medical imaging, volume 1: physics and psychophysics*. SPIE Press Bellingham, WA, 2000.

**Video 1. Alveolar structure in excised air-filled lung with emphysema.** Surface rendering of lung alveolar structure from a 20 minute, 7.2 Gy scan.
